# Supplementary material for: An Immunomodulatory Gallotanin-Rich Fraction From Caesalpinia spinosa Enhances the Therapeutic Effect of Anti-PD-L1 in Melanoma
Source: PubMed Central journal article supplement (PMC7708328; doi:10.3389/fimmu.2020.584959), 2020-11-18
Supplement: Presentation_1.pdf [file Presentation_1.pdf]

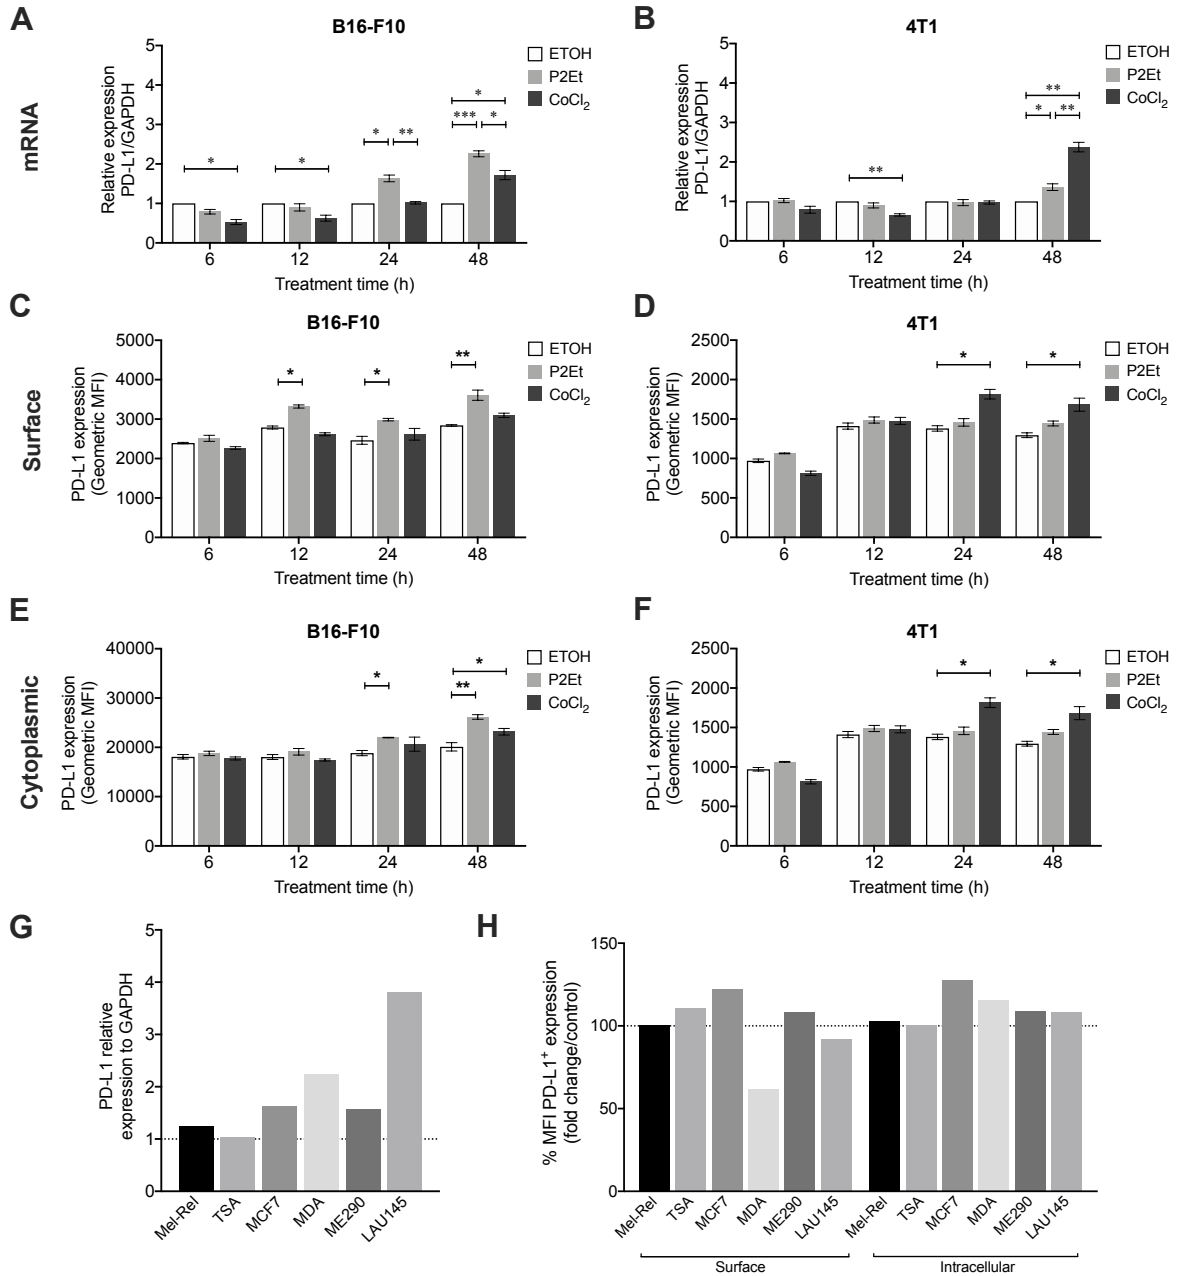

**Supplementary Figure 1. Effect of P2Et treatment on PD-L1 expression in cell lines.** PD-L1 relative expression to GAPDH gene in B16-F10 (**A**) and 4T1 (**B**) cultured cells during 6, 12, 24 and 48 hours with one-half of the P2Et IC<sub>50</sub> extract, cobaltous chloride (CoCl<sub>2</sub>) or ethanol (EtOH) analyzed by qRT-PCR and quantitated as a fold change against the control by using the  $2^{-\Delta\Delta CT}$  method. Geometric Mean Fluorescence Intensity (MFI) of surface (**C and D**) or intracellular (**E and F**) PD-L1 expression in B16-F10 (**C and E**) and 4T1 (**D and F**) cells. (**G**) PD-L1 relative expression to GAPDH gene in cells treated during 48 hours with one-half of the P2Et IC<sub>50</sub> extract analyzed by qRT-PCR and quantitated as a fold change against the control (EtOH) by using the  $2^{-\Delta\Delta CT}$  method. (**H**) MFI of surface or intracellular PD-L1 expression represented as fold change against to the control (EtOH). In all cases data

are represented as the mean  $\pm$  SEM. The  $p$  values were calculated using a Mann-Whitney  $U$  test or Kruskal-Wallis test with Dunn's post-test. \* $p$  < 0.05, \*\* $p$  < 0.01, \*\*\* $p$  < 0.001.

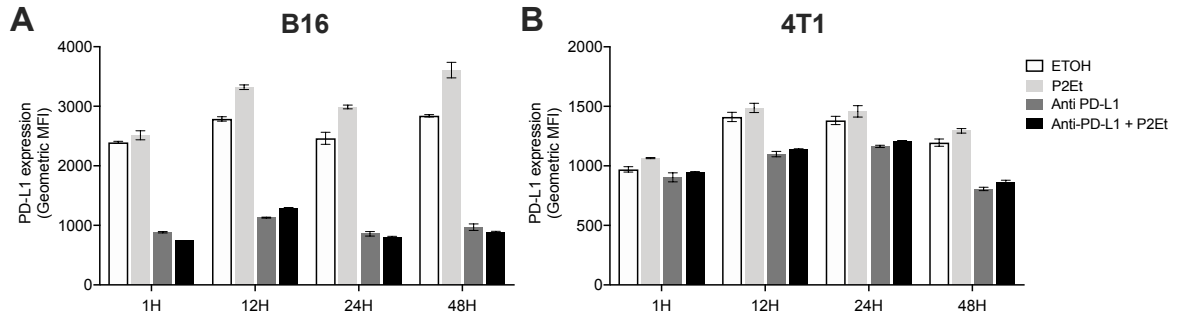

**Supplementary Figure 2. In vitro staining of surface PD-L1 after adding 10X more the therapeutic anti-PD-L1 antibody.** Geometric Mean Fluorescence Intensity (MFI) of surface PD-L1 expression in B16-F10 (A) and 4T1 (B) cells at 1, 12, 24 or 48 hours after in vitro treatment with P2Et, therapeutic anti-PD-L1 or anti-PD-L1 + P2Et.

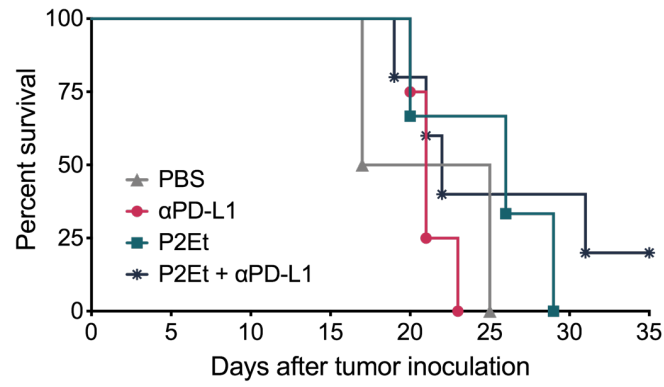

**Supplementary Figure 3.** Survival analysis in B16-F10 tumor-bearing mice treated with alphaPD-L1, P2Et, P2Et plus alphaPD-L1 or PBS as control.

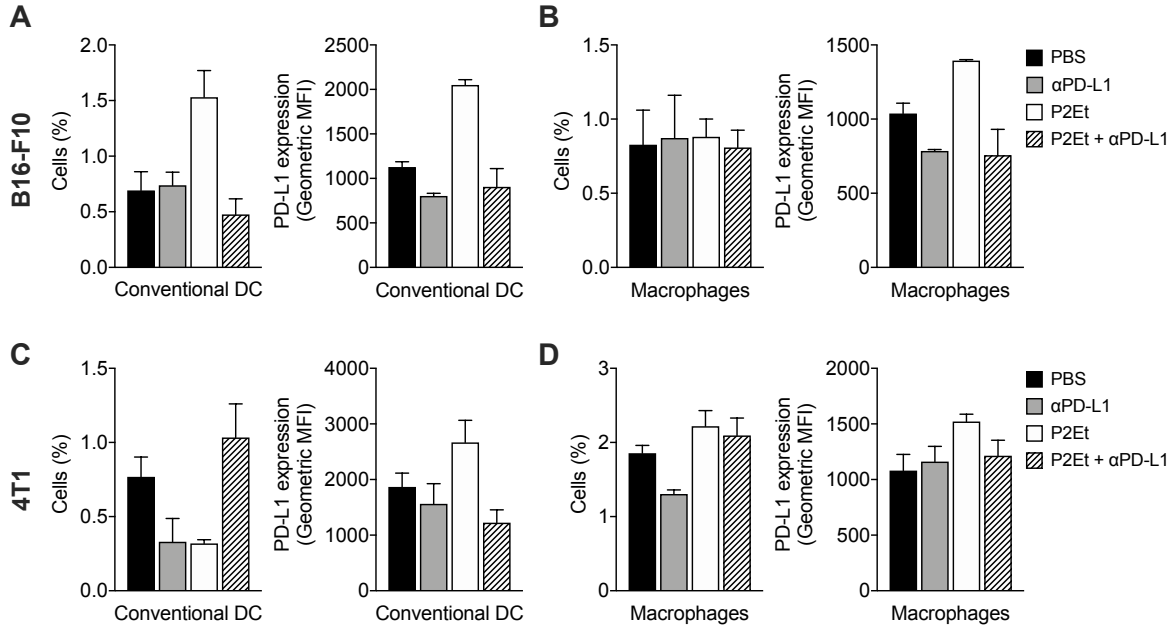

**Supplementary Figure 4. Effect of treatments in conventional dendritic cells and macrophages from tumor-draining lymph nodes.** (A) Frequency of conventional DC and Geometric Mean Fluorescence Intensity (MFI) of PD-L1 expression in cDC from B16 tumor bearing-mice. (B) Frequency of macrophages and geometric MFI of PD-L1 expression in macrophages from B16 tumor bearing-mice (n=3). (C) Frequency of conventional DC and Geometric Mean Fluorescence Intensity (MFI) of PD-L1 expression in cDC from 4T1 tumor bearing-mice. (D) Frequency of macrophages and geometric MFI of PD-L1 expression in macrophages from 4T1 tumor bearing-mice (n=3). In all cases data are represented as the mean  $\pm$  SEM.

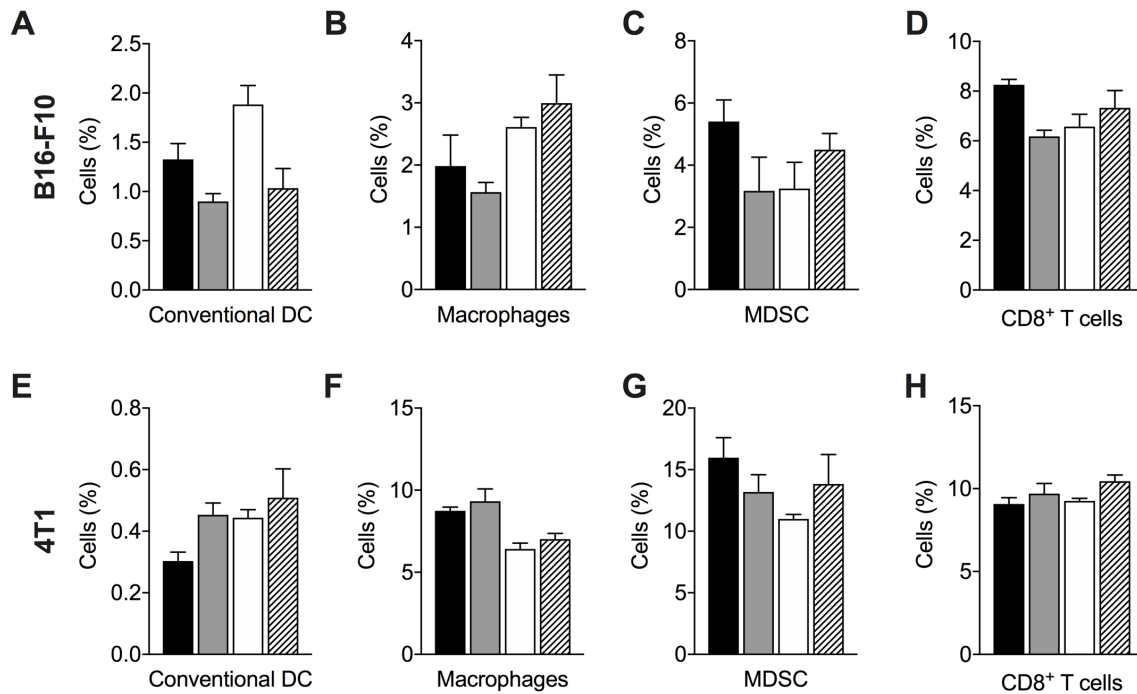

**Supplementary Figure 5. Effect of treatments in conventional dendritic cells, macrophages, MDSC and CD8<sup>+</sup> T cells from spleen.** Frequency of conventional DC (A), macrophages (B), MDSC (C), and CD8<sup>+</sup> T cells (D) from B16 tumor bearing-mice (n=3) treated with PBS, P2Et, therapeutic anti-PD-L1 or anti-PD-L1 + P2Et. Frequency conventional DC (E), macrophages (F), MDSC (G), and CD8<sup>+</sup> T cells (H) from 4T1 tumor bearing-mice (n=3) treated with PBS, P2Et, therapeutic anti-PD-L1 or anti-PD-L1 + P2Et. In all cases data are represented as the mean  $\pm$  SEM.

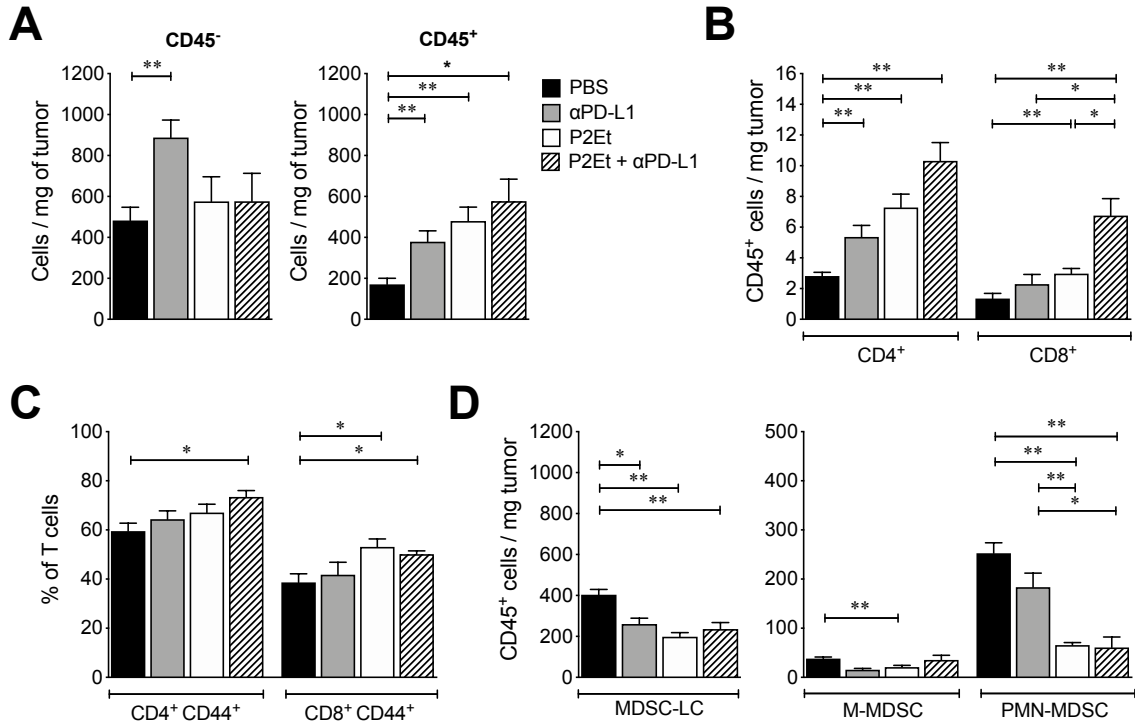

**Supplementary Figure 6. P2Et,  $\alpha$ PD-L1 or P2Et plus  $\alpha$ PD-L1 treatments modulates the immune response in breast 4T1 model. (A) Absolute numbers of CD45<sup>-</sup> and CD45<sup>+</sup> cells per mg of tumor in mice treated with  $\alpha$ PD-L1, P2Et, P2Et plus  $\alpha$ PD-L1 or PBS (control). (B) Absolute numbers of CD4<sup>+</sup> and CD8<sup>+</sup> T cells per mg of tumor in each group of treated mice. (C) Frequency of activated CD44<sup>+</sup> CD4<sup>+</sup> and CD8<sup>+</sup> T cells in tumor from each group of treated mice. (D) Number of MDSC-LC, M-MDSC and PMN-MDSC per mg of tumor from  $\alpha$ PD-L1, P2Et, P2Et plus  $\alpha$ PD-L1 or PBS treated mice. In all cases data are represented as the mean  $\pm$  SEM. \* $p < 0.05$ , \*\* $p < 0.01$ .**
